# Supplementary material for: Changes in circulating cell-free nuclear DNA and mitochondrial DNA of patients with adolescent idiopathic scoliosis
Source: BMC Musculoskelet Disord. 2019 Oct 25;20:479. doi: 10.1186/s12891-019-2869-5 (PMC6815015; doi:10.1186/s12891-019-2869-5)
Supplement: Supplementary file 1 — Additional file 1. Information of AIS patients and controls, The gender, Age, Lenke type and Cobb angle of studied population. [file 12891_2019_2869_MOESM1_ESM.xlsx]

## Sheet: Sheet1
ID	GENDER	AGE	Lenke type	Cobb angle
A1	F	15	1	27
A2	F	13	1	39.3
A3	F	18	1	30.1
A4	F	16	1	29.3
A5	F	15	1	27.7
A6	F	16	1	29.6
A7	F	16	1	23.6
A8	F	15	1	31
A9	F	15	1	28.1
A10	F	14	1	27
A11	F	15	1	31.3
A12	F	14	1	27.4
A13	F	15	1	22.5
A14	F	13	1	30.4
A15	F	12	1	61
A16	F	16	1	34.6
A17	F	12	1	26
A18	F	15	1	48.3
A19	F	15	1	58.6
A20	F	14	1	42
A21	F	12	1	49.1
A22	F	14	1	23.3
A23	F	15	1	31
A24	F	12	1	44.4
A25	F	12	1	100
A26	F	15	1	41
A27	F	11	1	44.9
A28	F	15	1	46.5
A29	F	15	1	27
A30	M	15	1	38.6
A31	M	11	1	21
A32	M	15	1	43.6
A33	M	16	1	16.4
A34	M	16	1	33.1
A35	M	15	1	38.1
A36	M	14	1	28.4
A37	M	13	1	32
A38	M	13	1	49.3
A39	M	15	1	40
A40	M	12	1	30.7
A41	F	15	5	21.9
A42	F	16	5	20
A43	F	10	5	19.7
A44	F	10	5	13.5
A45	M	15	5	20.4
A46	F	17	5	27.1
A47	F	11	5	13.4
A48	F	16	5	44.7
A49	F	16	5	49.1
A50	F	16	5	24
A51	F	17	5	35.9
A52	F	14	5	40.6
A53	F	16	5	29
A54	M	18	5	28.5
A55	F	13	5	25.4
A56	F	16	5	37.6
A57	F	13	5	23.8
A58	F	17	5	10
A59	F	13	5	33.6
A60	F	13	5	54.4
A61	F	14	5	48.3
A62	F	13	5	41.1
A63	M	15	5	16
A64	M	15	5	38.3
A65	F	13	2	36.3
A66	M	14	2	55.5
A67	F	15	3	59
A68	F	13	4	50.3
A69	M	14	4	95
C1	F	10
C2	F	14
C3	M	12
C4	M	12
C5	M	11
C6	M	14
C7	F	10
C8	F	10
C9	F	15
C10	F	16
C11	M	18
C12	F	17
C13	F	15
C14	F	18
C15	F	17
C16	F	16
C17	M	12
C18	F	13
C19	F	11
C20	F	18
C21	F	16
Note: A, AIS; C, Control.
