# Supplementary material for: Changes in circulating cell-free nuclear DNA and mitochondrial DNA of patients with adolescent idiopathic scoliosis
Source: BMC Musculoskelet Disord. 2019 Oct 25;20:479. doi: 10.1186/s12891-019-2869-5 (PMC6815015; doi:10.1186/s12891-019-2869-5)
Supplement: Supplementary file 2 — Additional file 2. The data of ccf DNA levels in AIS patients and controls, The ccf n-DNA-ACTB, ccf n-DNA-GAPDH and ccf mt-DNA-ND1 concentration of studied population. [file 12891_2019_2869_MOESM2_ESM.xlsx]

## Sheet: SHEET1
ID	GAPDH GE/ml	ACTB GE/ml	MT-ND1 GE/ml
A1	164.567	5473.57	1.40973e+08
A2	712.221	2406.44	1.41223e+06
A3	873.941	4518.5	1.4267e+06
A4	1018.01	9921.02	1.06756e+06
A5	388.028	1117	1.84043e+07
A6	646.489	1780.68	5.88151e+06
A7	483.734	1844.91	5.96899e+08
A8	1718.55	3086.48	1.4298e+06
A9	489.934	12680.6	9.80415e+06
A10	4516.63	5794.17	37392.8
A11	572.648	6243.36	472242
A12	282.907	6347.85	8.67935e+06
A13	302.179	3152.75	5.66539e+08
A14	1426.17	3246.35	3.103e+07
A15	682.958	11011.3	1.7389e+08
A16	980.281	2283.84	9.72313e+07
A17	670.582	8375.32	4.49077e+07
A18	675.094	1893.31	2.36921e+07
A19	237.176	953.505	3.54857e+06
A20	1854.47	2501.88	5.01166e+07
A21	499.146	1968.83	4.07923e+06
A22	2814.48	4609.09	847380
A23	1903.2	22585.6	2.16988e+07
A24	433.227	2352.4	326172
A25	3569.79	4225.82	10705.5
A26	195.073	1150.05	2.99875e+07
A27	423.386	1874.3	3.17414e+08
A28	407.408	1793.67	7.80021e+07
A29	943.062	3966.46	7.65223e+07
A30	664.409	1472.39	1.70906e+06
A31	1952.7	6097.2	1.61678e+06
A32	694.615	6845.56	4.94028e+07
A33	443.402	870.696	2.3179e+07
A34	3954.37	5258.91	524319
A35	7791.65	9146.03	1.40661e+07
A36	1328	11649.5	2.56101e+07
A37	6096.18	42433.6	404233
A38	3663.56	33642	2.88299e+06
A39	455.109	1682.22	2.12318e+06
A40	3132.85	22926.5	1.35514e+06
A41	853.834	1945.25	298697
A42	376.964	4919.09	264565470
A43	1725.06	2561	7.93884e+06
A44	619.356	1767.16	2.66564e+07
A45	267.417	2653.98	1.38576e+06
A46	465.165	1702.58	2.77514e+07
A47	2087.67	20074	1.4381e+08
A48	289.013	3228.47	8.44621e+07
A49	7181.74	47640.7	5.2722e+08
A50	615.904	6872.65	1.74199e+08
A51	376.354	5973.85	2.47733e+08
A52	259.594	831.919	1.67461e+06
A53	497.869	7193.35	3.04698e+08
A54	8178.72	19111.7	5.24406e+07
A55	6262.16	34624.6	4.4891e+08
A56	539.001	913.748	6.2483e+06
A57	1290.28	13165.9	366909
A58	433.232	1797.57	3.64691e+06
A59	495.174	3714.82	2.03124e+08
A60	666.864	10459.4	2.64472e+08
A61	631.897	9626.02	6.32869e+08
A62	718.454	1799.3	41526.7
A63	1241.37	3415.17	245196
A64	2766.75	5349.5	173300
A65	622.775	2156.21	9.13672e+06
A66	1218.41	18737.8	5.53293e+07
A67	2073.28	6703.76	342583
A68	969.929	7681.37	3.94132e+07
A69	874.195	2738.87	1.364e+06
C1	1114.75	3164.39	6.23924e+06
C2	599.486	7413.62	4.099e+06
C3	863.435	12284.5	2.23362e+06
C4	15054.5	20080.8	3.07241e+07
C5	16603.2	76923.7	1.03887e+07
C6	4561.05	27772	3.34614e+07
C7	1304.58	7388.71	7.94547e+07
C8	838.976	1810.56	2.32149e+07
C9	871.686	8460.02	1.40271e+08
C10	836.761	2640.85	549234
C11	3206.73	7034.12	751812
C12	376.436	790.688	1.69534e+06
C13	1145.1	3527.2	2.11067e+07
C14	14792.3	77774.5	5.36958e+07
C15	1337.01	14894.9	9.9548e+07
C16	454.844	3374.44	6.7084e+07
C17	657.529	3747.7	7.50361e+07
C18	515.669	8818.91	1.29417e+08
C19	477.066	11431.7	2.99092e+07
C20	536.606	4846.56	154323887
C21	744.842	11183	8.54924e+06
Note: A, AIS; C, Control.
